# Supplementary material for: MoO3@MoS2 Core-Shell Structured Hybrid Anode Materials for Lithium-Ion Batteries
Source: MDPI journal article supplement (doi:10.3390/nano12122008), 2022-06-10
Supplement: s1 [file s1]

# Supplementary Materials

## MoO<sub>3</sub>@MoS<sub>2</sub> Core-Shell Structured Hybrid Anode Materials for Lithium-Ion Batteries

Muhammad Faizan <sup>1</sup>, Sajjad Hussain <sup>2,3</sup>, Mobinul Islam <sup>1,\*</sup>, Ji-Young Kim <sup>4</sup>, Daseul Han <sup>1</sup>, Jee-Hwan Bae <sup>4</sup>, Dhanasekaran Vikraman <sup>5</sup>, Basit Ali <sup>1</sup>, Saleem Abbas <sup>6</sup>, Hyun-Seok Kim <sup>5</sup>, Aditya Narayan Singh <sup>1</sup>, Jongwan Jung <sup>2,3</sup> and Kyung-Wan Nam <sup>1,\*</sup>

<sup>1</sup> Department of Energy & Materials Engineering, Dongguk University, Seoul 04620, Korea; faizijaff@gmail.com (M.F.); endend42@naver.com (D.H.); basitalikhan077@gmail.com (B.A.); aditya@dongguk.edu (A.N.S.)

<sup>2</sup> Hybrid Materials Center (HMC), Sejong University, Seoul 05006, Korea; shussainawan@gmail.com (S.H.); jwjung@sejong.ac.kr (J.J.)

<sup>3</sup> Department of Nanotechnology and Advanced Materials Engineering, Sejong University, Seoul 05006, Korea

<sup>4</sup> Advanced Analysis & Data Center, Korea Institute of Science and Technology (KIST), Seoul 02792, Korea; jkim1128@kist.re.kr (J.-Y.K.); jhbae@kist.re.kr (J.-H.B.)

<sup>5</sup> Division of Electronics and Electrical Engineering, Dongguk University-Seoul, Seoul 04620, Korea; v.j.dhanasekaran@gmail.com (D.V.); hyunseokk@dongguk.edu (H.-S.K.)

<sup>6</sup> Centre for Energy Storage Research, Korea Institute of Science and Technology (KIST), Seoul 02792, Korea; saleem.abbas203@gmail.com

\* Correspondence: mobin85@dongguk.edu (M.I.); knam@dongguk.edu (K.-W.N.)

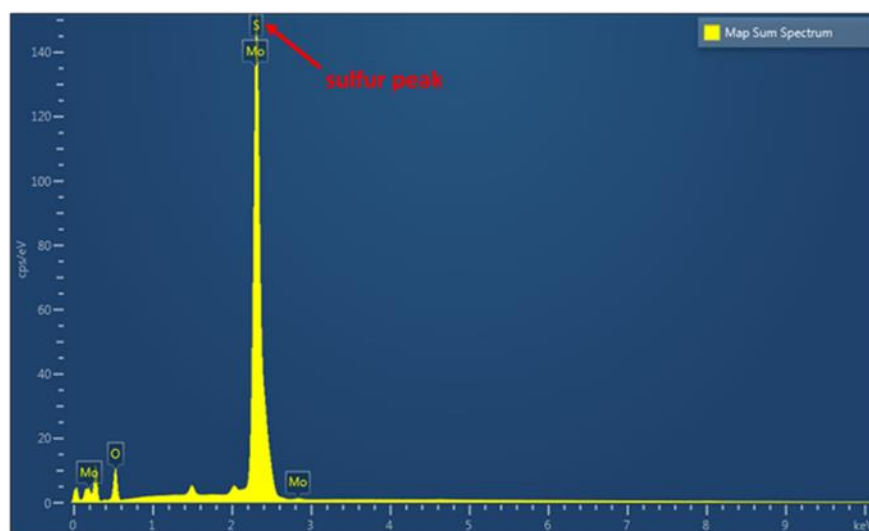

**Figure S1.** EDX spectrum of  $\text{MoO}_3@\text{MoS}_2$ .

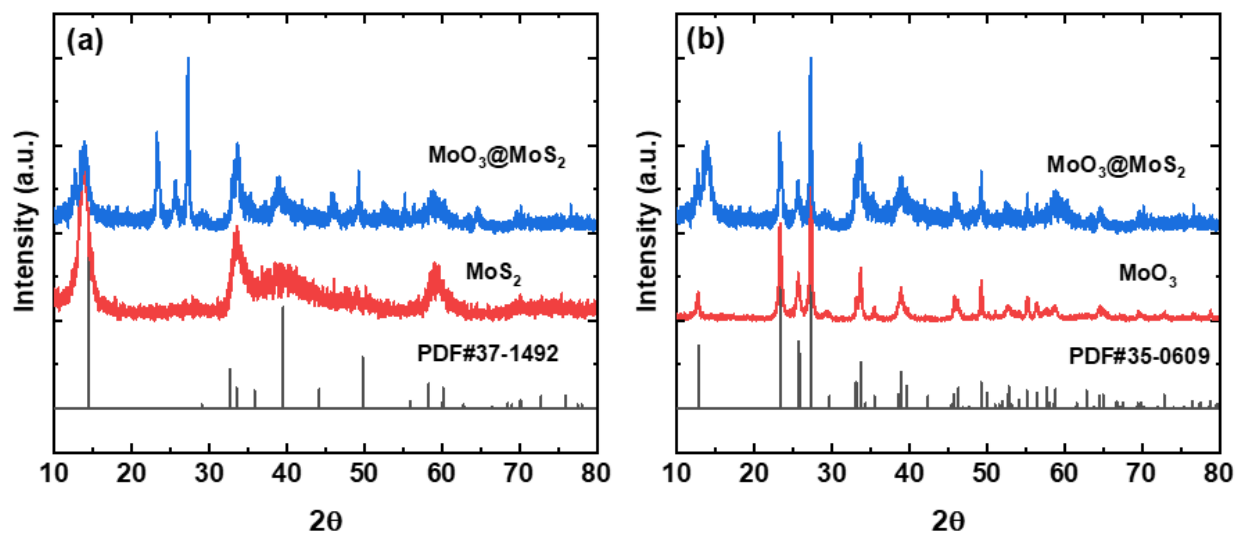

**Figure S2.** XRD of (a)  $\text{MoS}_2$  and (b)  $\text{MoO}_3$ , including  $\text{MoO}_3@\text{MoS}_2$ , compared with their corresponding standard (PDF) data.

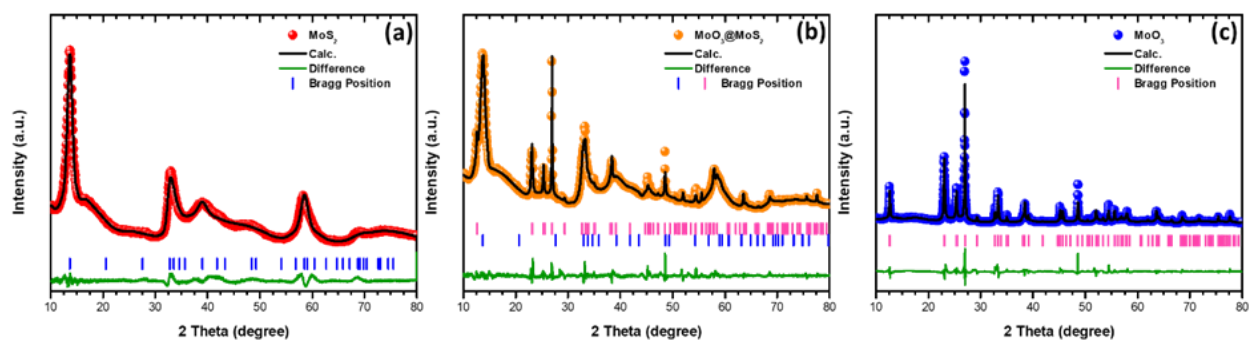

**Figure S3.** Profile matching of HRPD data of (a)  $\text{MoS}_2$ , (b)  $\text{MoO}_3@/\text{MoS}_2$ , and (c)  $\text{MoO}_3$ .

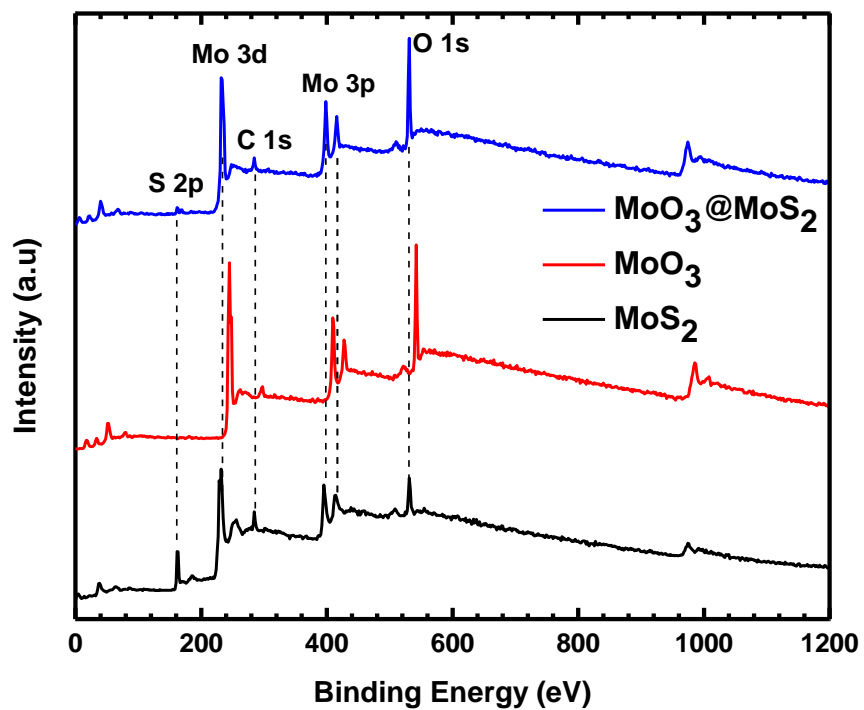

**Figure S4.** XPS survey spectrum of  $\text{MoS}_2$ ,  $\text{MoO}_3$ , and  $\text{MoO}_3@/\text{MoS}_2$ .

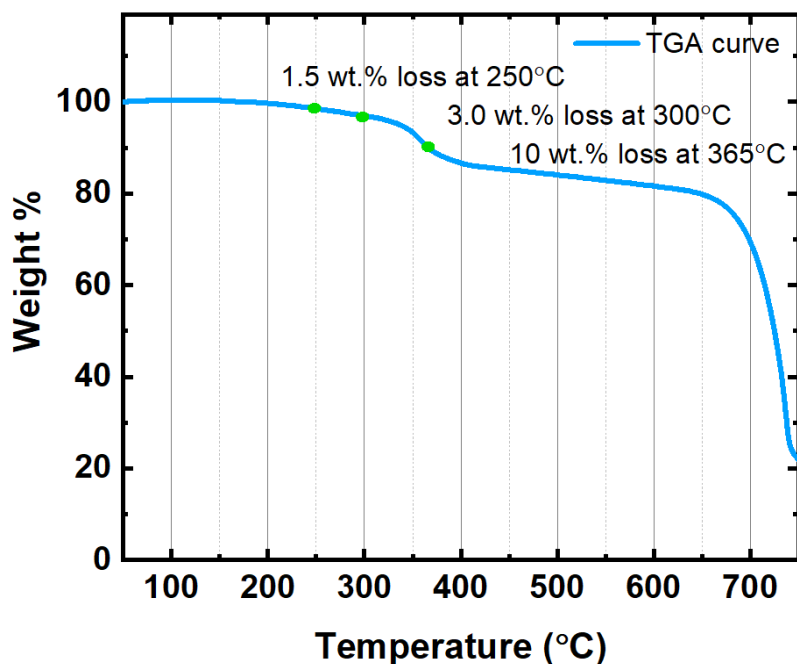

**Figure S5.** Thermogravimetric analysis (TGA) curve of as-synthesized MoS<sub>2</sub> in air.

#### Calculation of the ratio of MO<sub>3</sub> to MS<sub>2</sub> in the MoO<sub>3</sub>@MoS<sub>2</sub>.

MoS<sub>2</sub> (Mw: 160.07 g/mol) and MoO<sub>3</sub> (Mw: 143.94 g/mol)

If MoS<sub>2</sub> is fully decomposed to MoO<sub>3</sub>,

$$\text{MoO}_3/\text{MoS}_2 = 143.94 / 160.07 = 0.899 \Rightarrow \text{then } 10 \text{ wt}\% \text{ decrease}$$

From the TGA data, we observed 1.5 wt% loss after the oxidation process above 250 °C. Therefore, we can determine that MoS<sub>2</sub>:MoO<sub>3</sub> ratio is approximately 8.5:1.5 in **MoO<sub>3</sub>@MoS<sub>2</sub>** hybrid based on the TGA data.

The **MoO<sub>3</sub>@MoS<sub>2</sub>** hybrid anode theoretical capacity (1 C= 737 mAh g<sup>-1</sup>) calculated by the rule of mixtures of the two active materials:

$$(C_{\text{MoO}_3@\text{MoS}_2} = C_{\text{MoS}_2} \times 0.85 + C_{\text{MoO}_3} \times 0.15 = 670 \text{ mAh g}^{-1} \times 0.85 + 1117 \text{ mAh g}^{-1} \times 0.15).$$

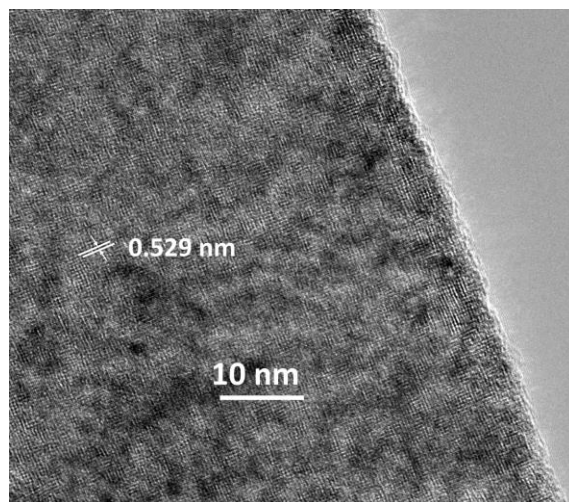

**Figure S6:** HR-TEM image of the MoO<sub>3</sub>@MoS<sub>2</sub> sample.

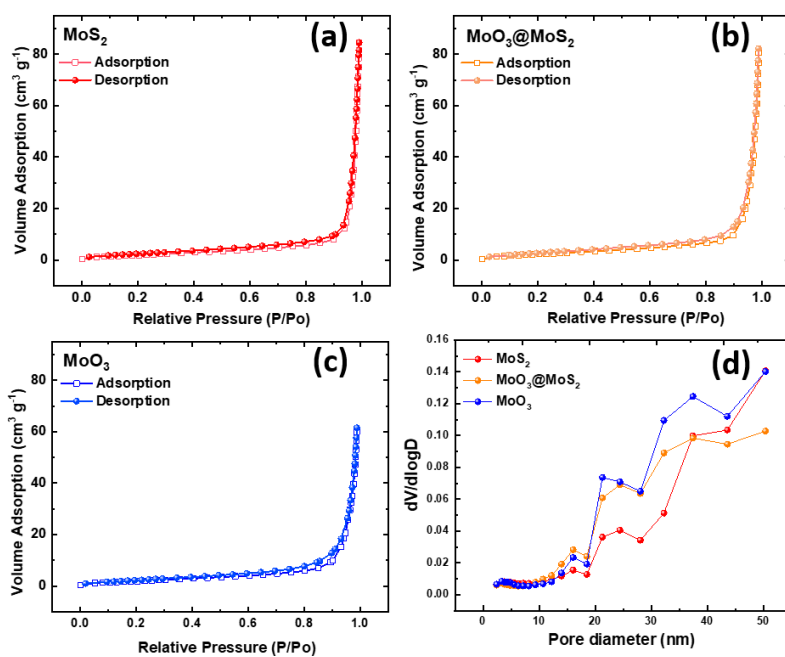

**Figure S7.** (a-c) BET and (d) corresponding BJH profile of MoS<sub>2</sub>, MoO<sub>3</sub>, and MoO<sub>3</sub>@MoS<sub>2</sub>.

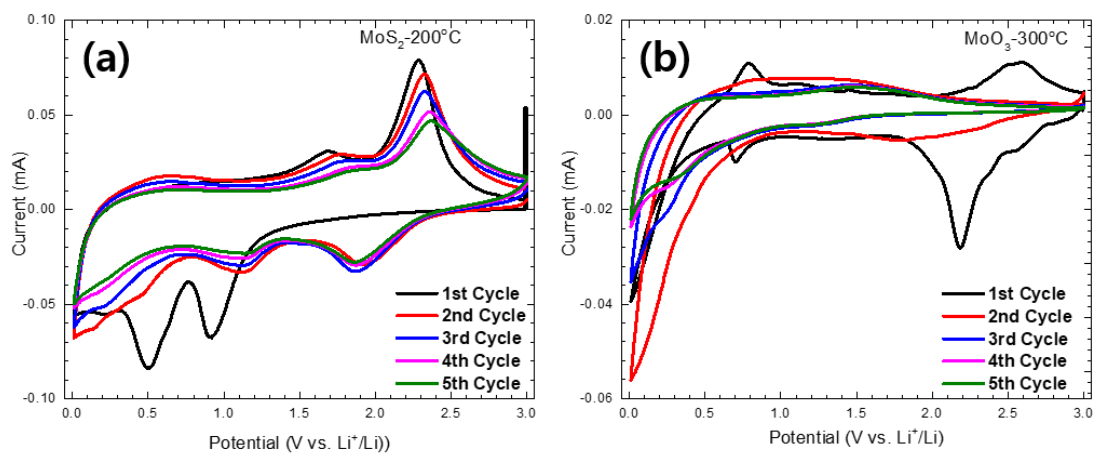

**Figure S8.** CV curves of (a) MoS<sub>2</sub> and (b) MoO<sub>3</sub> anodes.

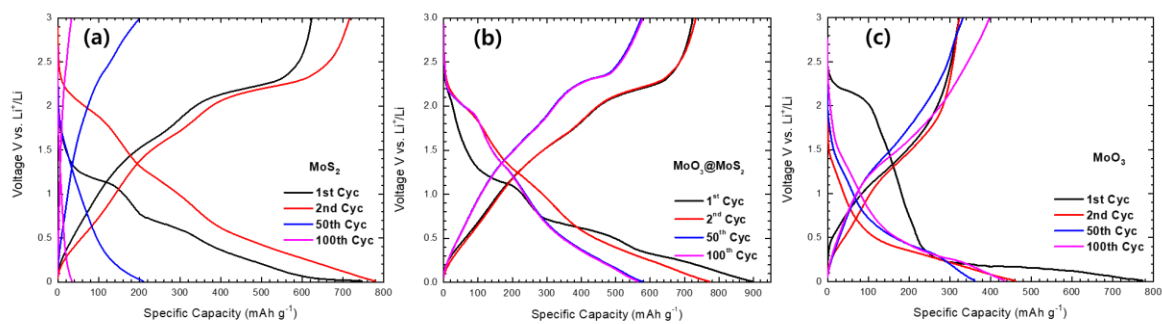

**Figure S9.** GCD curves of the (a) MoS<sub>2</sub>, (b) MoO<sub>3</sub>@MoS<sub>2</sub> and (c) MoO<sub>3</sub>.

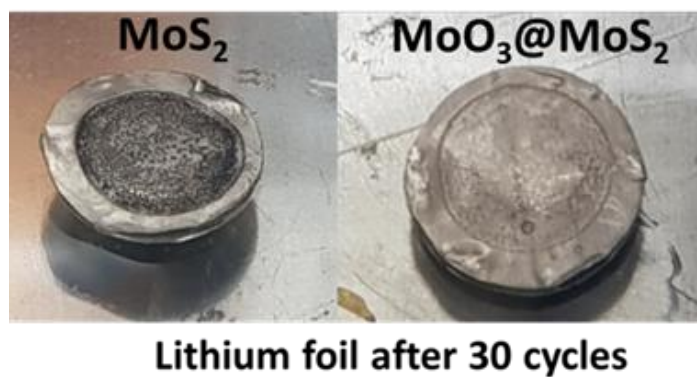

**Figure S10.** Photos of Li counter electrodes for the  $\text{MoS}_2$  and  $\text{MoO}_3@\text{MoS}_2$  electrodes half-cells.

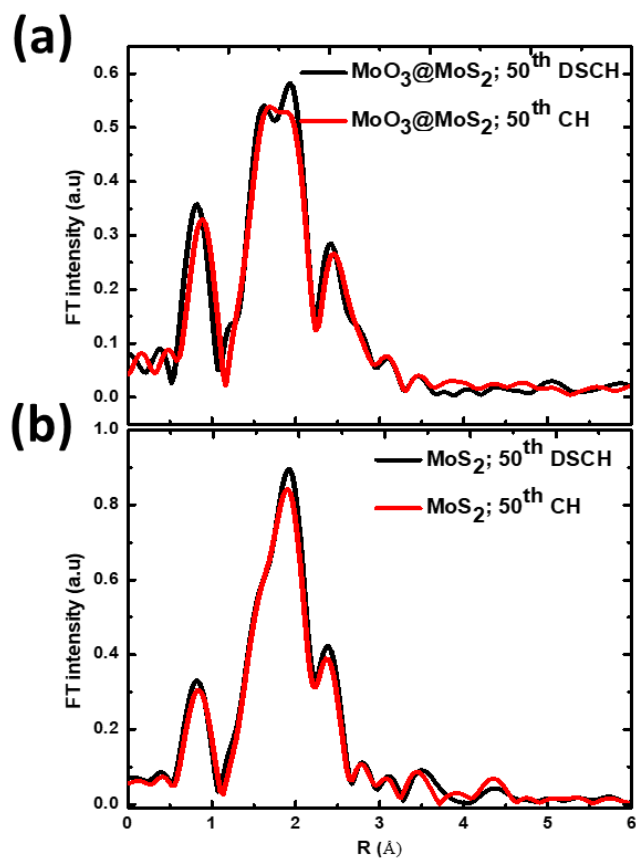

**Figure S11.** Ex-situ Mo k-edge FT-EXAFS spectra of  $\text{MoS}_2$  and  $\text{MoO}_3@\text{MoS}_2$  after 50 cycles.

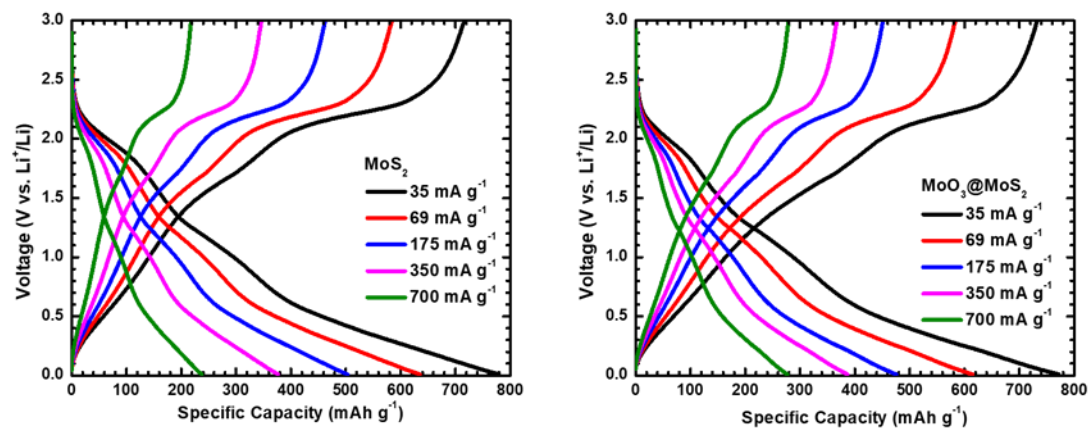

**Figure S12.** The galvanostatic voltage profiles (rate performance) of  $\text{MoS}_2$  and  $\text{MoO}_3@\text{MoS}_2$  anodes at different current densities in LIBs.



**Table S1.** Unit cell parameters of MoS<sub>2</sub>, MoO<sub>3</sub>@MoS<sub>2</sub>, and MoO<sub>3</sub>.

|                                    | MoS <sub>2</sub> |         |                    | MoO <sub>3</sub> |         |        |                    |
|------------------------------------|------------------|---------|--------------------|------------------|---------|--------|--------------------|
|                                    | (a,b)<br>Å       | (c) Å   | (v) Å <sup>3</sup> | (a) Å            | (b) Å   | (c) Å  | (v) Å <sup>3</sup> |
| MoS <sub>2</sub>                   | 3.1132           | 12.7912 | 107.3655           |                  |         |        |                    |
| MoO <sub>3</sub> @MoS <sub>2</sub> | 3.0938           | 12.7677 | 105.8369           | 3.9518           | 13.8893 | 3.7001 | 203.0908           |
| MoO <sub>3</sub>                   |                  |         |                    | 3.9615           | 13.8737 | 3.6981 | 203.254            |

**Table S2.** Result of BET analysis of MoS<sub>2</sub>, MoO<sub>3</sub>@MoS<sub>2</sub>, and MoO<sub>3</sub>.

| Sample                             | BET (m <sup>2</sup> g <sup>-1</sup> ) | Pore volume (cm <sup>3</sup> g <sup>-1</sup> ) | Mean pore diameter (nm) |
|------------------------------------|---------------------------------------|------------------------------------------------|-------------------------|
| MoS <sub>2</sub>                   | 8.71                                  | 0.1011                                         | 46.423                  |
| MoO <sub>3</sub> @MoS <sub>2</sub> | 8.42                                  | 0.129                                          | 61.61                   |
| MoO <sub>3</sub>                   | 9.85                                  | 0.1317                                         | 53.455                  |

**Table S3.** Fitted solution resistance (R<sub>s</sub>) and charge transfer resistance (R<sub>ct</sub>) values of MoS<sub>2</sub>, MoO<sub>3</sub>@MoS<sub>2</sub>, and MoO<sub>3</sub> after 1<sup>st</sup> cycle.

| Sample                             | R <sub>s</sub> (Ω) | R <sub>ct</sub> (Ω) |
|------------------------------------|--------------------|---------------------|
| MoS <sub>2</sub>                   | 82.26              | 473.24              |
| MoO <sub>3</sub> @MoS <sub>2</sub> | 2.392              | 284.308             |
| MoO <sub>3</sub>                   | 6.656              | 518.44              |

**Table S4.** Fitted solution resistance (R<sub>s</sub>) and charge transfer resistance (R<sub>ct</sub>) values of MoS<sub>2</sub>, MoO<sub>3</sub>@MoS<sub>2</sub>, and MoO<sub>3</sub> after 30<sup>th</sup> cycle.

| Sample                             | R <sub>s</sub> (Ω) | R <sub>ct</sub> (Ω) |
|------------------------------------|--------------------|---------------------|
| MoS <sub>2</sub>                   | 75.77              | 728.33              |
| MoO <sub>3</sub> @MoS <sub>2</sub> | 6.261              | 304.539             |
| MoO <sub>3</sub>                   | 2.476              | 700                 |

**Table S5.** Comparative table depicting electrochemical performance of selected TMO/TMS and/or carbon hybrids.

| Materials                                              | Current density (mA g <sup>-1</sup> ) | Cycle number | Reversible capacity (mAh g <sup>-1</sup> ) | References       |
|--------------------------------------------------------|---------------------------------------|--------------|--------------------------------------------|------------------|
| SnS <sub>2</sub> /SnO <sub>2</sub>                     | 100                                   | 80           | 520                                        | [1]              |
| MoO <sub>3</sub> /SnS <sub>2</sub>                     | 100                                   | 100          | 504                                        | [2]              |
| TiO <sub>2</sub> @MoS <sub>2</sub>                     | 100                                   | 100          | 544                                        | [3]              |
| VS <sub>2</sub> @CNT                                   | 200                                   | 100          | 850                                        | [4]              |
| MoS <sub>2</sub> /MoO <sub>3</sub> /N-doped carbon     | 1000                                  | 350          | 887.5                                      | [5]              |
| MoSe <sub>2</sub> @porous hollow carbon spheres (PHCS) | 1000                                  | 100          | 681                                        | [6]              |
| Si@Li <sub>4</sub> Ti <sub>5</sub> O <sub>12</sub>     | 500                                   | 150          | 883                                        | [7]              |
| <b>MoO<sub>3</sub>@MoS<sub>2</sub></b>                 | <b>50</b>                             | <b>100</b>   | <b>564</b>                                 | <b>This work</b> |

## References

- [1] K. Chang, W-X. Chen, H. Li, H. Li, Microwave-assisted synthesis of SnS<sub>2</sub>/SnO<sub>2</sub> composites by L-cysteine and their electrochemical performances when used as anode materials of li-ion batteries, *Electrochim. Acta*, 56 (2011) 2856-2861.
- [2] C. Hu, H. Shu, Z. Shen, T. Zhao, P. Liang, X. Chen, Hierarchical MoO<sub>3</sub>/SnS<sub>2</sub> core-shell nanowires with enhanced electrochemical performance for lithium-ion batteries, *Phys. Chem. Chem. Phys.*, 20 (2018) 17171-17179.
- [3] X. Li, W. Li, M. Li, P. Cui, D. Chen, T. Gengenbach, L. Chu, H. Liu, G. Song, Glucose-assisted synthesis of the hierarchical TiO<sub>2</sub> nanowire@MoS<sub>2</sub> nanosheet nanocomposite and its synergistic lithium storage performance, *J. Mater. Chem. A*, 3 (2015) 2762-2769.
- [4] X. Li, J. Fu, Y. Sun, M. Sun, S. Cheng, K. Chen, X. Yang, Q. Lou, T. Xu, Y. Shang, J. Xu, Q. Chen, C. Shan, Design and understanding of core/branch-structured VS<sub>2</sub> nanosheets@CNTs as high-performance anode materials for lithium-ion batteries, *Nanoscale*, 11 (2019) 13343-13353.
- [5] K. Zhu, X. Wang, J. Liu, S. Li, H. Wang, L. Yang, S. Liu, T. Xie, Novel amorphous MoS<sub>2</sub>/MoO<sub>3</sub>/nitrogen-doped carbon composite with excellent electrochemical performance for lithium ion batteries and sodium ion batteries, *ACS Sustain. Chem. Eng.*, 5 (2017) 8025-8034.
- [6] X. Yang, Z. Zhang, Y. Fu, Q. Li, Porous hollow carbon spheres decorated with molybdenum diselenide nanosheets as anodes for highly reversible lithium and sodium storage, *Nanoscale*, 7 (2015) 10198-10203.
- [7] M. Liu, H. Gao, G. Hu, K. Zhu, H. Huang, Facile preparation of core-shell Si@Li<sub>4</sub>Ti<sub>5</sub>O<sub>12</sub> nanocomposite as large-capacity lithium-ion battery anode, *J. Energy Chem.*, 40 (2020) 89-98.
